# Supplementary material
Source: PubMed Central journal article supplement (PMC3581934)
Supplement: 1208302110_pnas.201208302SI.pdf [file 1208302110_pnas.201208302SI.pdf]

# Supporting Information

Strotz and Allen 10.1073/pnas.1208302110

**Table S1.** List of ancestor/descendant relationships where the range overlap falls within our proposed estimate of total error

| Ancestor                                 | Descendant                                 | Ancestor LAD | Descendant FAD | Range overlap | Potential speciation mechanism                                                                                                                 |
|------------------------------------------|--------------------------------------------|--------------|----------------|---------------|------------------------------------------------------------------------------------------------------------------------------------------------|
| Paleogene                                |                                            |              |                |               |                                                                                                                                                |
| <i>Hedbergella holmdelensis</i>          | <i>Globanomalina archeocompressa</i> *     | 64.9         | 64.95          | 0.05          | One potential anagenetic event                                                                                                                 |
| <i>Hedbergella monmouthensis</i>         | <i>Praemurica taurica</i> *                | 64.85        | 64.9           | 0.05          |                                                                                                                                                |
| <i>H. monmouthensis</i>                  | <i>Eoglobigerina eobulloides</i> *         | 64.85        | 64.97          | 0.12          | Two cladogenetic events and one potential anagenetic event <sup>†</sup>                                                                        |
| <i>H. monmouthensis</i>                  | <i>Parasubbotina aff_pseudobulloides</i> * | 64.85        | 65             | 0.15          |                                                                                                                                                |
| <i>Parasubbotina aff_pseudobulloides</i> | <i>Parasubbotina pseudobulloides</i> *     | 64.8         | 64.9           | 0.1           | One potential anagenetic event                                                                                                                 |
| <i>Praemurica taurica</i>                | <i>Praemurica psuedoinconstans</i>         | 63.8         | 64.8           | 1.0           | One potential anagenetic event                                                                                                                 |
| <i>Eoglobigerina eobulloides</i>         | <i>Subbotina trivialis</i>                 | 63.6         | 64.92          | 1.32          | One cladogenetic event <sup>†</sup><br>( <i>E. eobulloides</i> – <i>S. trivialis</i> )                                                         |
| <i>E. eobulloides</i>                    | <i>Eoglobigerina edita</i>                 | 63.6         | 64.9           | 1.3           | (1) and one potential anagenetic event<br>( <i>E. eobulloides</i> – <i>E. edita</i> )                                                          |
| <i>Globanomalina archeocompressa</i>     | <i>Globanomalina planocompressa</i>        | 62.8         | 64.9           | 2.1           | One cladogenetic event, one potential anagenetic event <sup>†</sup>                                                                            |
| <i>G. archeocompressa</i>                | <i>Globanomalina compressa</i> *           | 62.8         | 62.9           | 0.1           |                                                                                                                                                |
| <i>Globanomalina planocompressa</i>      | <i>Globanomalina imitata</i> *             | 62           | 62.05          | 0.05          | One potential anagenetic event                                                                                                                 |
| <i>Praemurica psuedoinconstans</i>       | <i>Praemurica inconstans</i>               | 61.15        | 62.8           | 1.65          | One potential anagenetic event                                                                                                                 |
| <i>Eoglobigerina edita</i>               | <i>Eoglobigerina spiralis</i> *            | 61.15        | 61.2           | 0.05          | One potential anagenetic event                                                                                                                 |
| <i>Subbotina trivialis</i>               | <i>Subbotina triangularis</i> *            | 61           | 61.1           | 0.1           | One cladogenetic event and one potential anagenetic <sup>†</sup>                                                                               |
| <i>S. trivialis</i>                      | <i>Subbotina cancellata</i> *              | 61           | 61.2           | 0.2           |                                                                                                                                                |
| <i>Praemurica inconstans</i>             | <i>Praemurica uncinata</i> *               | 60.9         | 61.2           | 0.3           | One potential anagenetic event                                                                                                                 |
| <i>Praemurica uncinata</i>               | <i>Praemurica lozanoi</i> *                | 60.7         | 60.75          | 0.05          | Two cladogenetic events <sup>†</sup>                                                                                                           |
| <i>P. uncinata</i>                       | <i>Igorina pusilla</i> *                   | 60.7         | 60.95          | 0.25          | ( <i>P. uncinata</i> – <i>P. lozanoi</i> ;                                                                                                     |
| <i>P. uncinata</i>                       | <i>Morozovella praeangulata</i> *          | 60.7         | 61.15          | 0.45          | <i>P. uncinata</i> – <i>P. pusilla</i> ) and one putative anagenetic event <sup>‡</sup><br>( <i>P. uncinata</i> – <i>M. praeangulata</i> ) (2) |
| <i>Globanomalina compressa</i>           | <i>Globanomalina ehrenbergi</i> *          | 60.7         | 61.1           | 0.4           | One potential anagenetic event                                                                                                                 |
| <i>Morozovella praeangulata</i>          | <i>Acarinina strabocella</i> *             | 60           | 60.8           | 0.8           | One cladogenetic event <sup>†</sup><br>( <i>M. praeangulata</i> – <i>A. strabocella</i> )                                                      |
| <i>M. praeangulata</i>                   | <i>Morozovella angulata</i>                | 60           | 60.95          | 0.95          | and one putative anagenetic event <sup>‡</sup><br>( <i>M. praeangulata</i> – <i>M. angulata</i> ) (2)                                          |
| <i>Igorina pusilla</i>                   | <i>Igorina tadjikistanensis</i> *          | 59.5         | 60             | 0.5           | One cladogenetic event and one potential anagenetic event <sup>†</sup>                                                                         |
| <i>I. pusilla</i>                        | <i>Igorina albeari</i> *                   | 59.5         | 60.05          | 0.55          |                                                                                                                                                |
| <i>Globanomalina ehrenbergi</i>          | <i>Globanomalina pseudomenardii</i> *      | 59.38        | 59.4           | 0.02          | One cladogenetic event and one potential anagenetic event <sup>†</sup>                                                                         |
| <i>G. ehrenbergi</i>                     | <i>Globanomalina chapmani</i> *            | 59.38        | 59.45          | 0.07          |                                                                                                                                                |

Table S1. Cont.

| Ancestor                                 | Descendant                                  | Ancestor LAD | Descendant FAD | Range overlap | Potential speciation mechanism                                                                                                                          |
|------------------------------------------|---------------------------------------------|--------------|----------------|---------------|---------------------------------------------------------------------------------------------------------------------------------------------------------|
| <i>Acarinina strabocella</i>             | <i>Acarinina nitida</i> *                   | 59.3         | 59.5           | 0.2           | One putative anagenetic event <sup>§</sup> (3)                                                                                                          |
| <i>Morozovella conicotruncata</i>        | <i>Morozovella velascoensis</i> *           | 59.3         | 59.9           | 0.6           | One potential anagenetic event                                                                                                                          |
| <i>Morozovella angulata</i>              | <i>Morozovella apantesma</i> *              | 59.3         | 60             | 0.7           | One cladogenetic event <sup>†</sup>                                                                                                                     |
| <i>M. angulata</i>                       | <i>Morozovella conicotruncata</i>           | 59.3         | 60.8           | 1.5           | ( <i>M. angulata</i> – <i>M. apantesma</i> ) (4) and one putative anagenetic event <sup>§</sup> ( <i>M. angulata</i> – <i>M. conicotruncata</i> ) (2)   |
| <i>Subbotina cancellata</i>              | <i>Subbotina patagonica</i> *               | 56.8         | 57             | 0.2           | One cladogenetic event <sup>†</sup>                                                                                                                     |
| <i>S. cancellata</i>                     | <i>Subbotina velascoensis</i>               | 56.8         | 59.2           | 2.4           | ( <i>S. cancellata</i> – <i>S. velascoensis</i> ) (1) and one potential anagenetic event ( <i>S. cancellata</i> – <i>S. patagonica</i> )                |
| <i>Acarinina mckannai</i>                | <i>Acarinina soldadoensis</i> *             | 56.3         | 56.4           | 0.1           | One putative anagenetic event <sup>§</sup> (5)                                                                                                          |
| <i>Acarinina nitida</i>                  | <i>Acarinina esnaensis</i> *                | 56.2         | 56.3           | 0.1           | One cladogenetic event and one potential anagenetic event <sup>†</sup>                                                                                  |
| <i>A. nitida</i>                         | <i>Acarinina coalingensis</i> *             | 56.2         | 56.5           | 0.3           |                                                                                                                                                         |
| <i>Globanomalina imitata</i>             | <i>Globanomalina australiformis</i> *       | 55.8         | 55.88          | 0.08          | One cladogenetic event and one potential anagenetic event <sup>†</sup>                                                                                  |
| <i>G. imitata</i>                        | <i>Globanomalina ovalis</i> *               | 55.8         | 56.5           | 0.7           |                                                                                                                                                         |
| <i>Subbotina triangularis</i>            | <i>Subbotina roesnaesensis</i> *            | 55.55        | 55.6           | 0.05          | One potential anagenetic event                                                                                                                          |
| <i>Igorina tadjikistanensis</i>          | <i>Igorina lodoensis</i> *                  | 55.4         | 55.8           | 0.4           | One cladogenetic event <sup>†</sup> (6)                                                                                                                 |
| <i>Acarinina sibaiyaensis</i>            | <i>Acarinina africana</i> *                 | 55.3         | 55.4           | 0.1           | One potential anagenetic event                                                                                                                          |
| <i>Globanomalina ovalis</i>              | <i>Globanomalina luxorensis</i> *           | 55.3         | 55.7           | 0.4           | One potential anagenetic event                                                                                                                          |
| <i>Morozovella velascoensis</i>          | <i>Morozovella edgari</i> *                 | 54.45        | 54.9           | 0.45          | One cladogenetic event <sup>†</sup> (2, 7)                                                                                                              |
| <i>Morozovella apantesma</i>             | <i>Morozovella aequa</i>                    | 54.45        | 56.5           | 2.05          | One cladogenetic event                                                                                                                                  |
| <i>M. apantesma</i>                      | <i>Planorotalites pseudoscitula</i>         | 54.45        | 55.9           | 1.45          | ( <i>M. apantesma</i> – <i>P. pseudoscitula</i> ) <sup>†</sup> (1) and one potential anagenetic event ( <i>M. apantesma</i> – <i>M. aequa</i> )         |
| <i>Subbotina velascoensis</i>            | <i>Subbotina hornibrooki</i>                | 54.45        | 55.6           | 1.15          | One cladogenetic event <sup>†</sup> (1)                                                                                                                 |
| <i>Morozovella velascoensis</i>          | <i>Morozovella allisonensis</i>             | 54.45        | 55.5           | 1.05          | One cladogenetic event <sup>†</sup> (1)                                                                                                                 |
| <i>Globanomalina luxorensis</i>          | <i>Pseudohastigerina wilcoxensis</i>        | 54.45        | 55.3           | 0.85          | One potential anagenetic event                                                                                                                          |
| <i>Globanomalina planoconica</i>         | <i>Planoglobanomalina pseudoalgeriana</i> * | 50.6         | 50.8           | 0.2           | One potential anagenetic event                                                                                                                          |
| <i>Morozovella lensiformis</i>           | <i>Morozovella aragonensis</i>              | 50.6         | 52.3           | 1.7           | One potential anagenetic event                                                                                                                          |
| <i>Acarinina interposita</i>             | <i>Acarinina pentacamerata</i>              | 50.4         | 52.3           | 1.9           | One potential anagenetic event                                                                                                                          |
| <i>Acarinina coalingensis</i>            | <i>Acarinina primitiva</i> *                | 50.1         | 50.8           | 0.7           | One potential anagenetic event                                                                                                                          |
| <i>Acarinina pseudotopilensis</i>        | <i>Acarinina mcgowrani</i>                  | 47.25        | 49.25          | 2.0           | One potential anagenetic event                                                                                                                          |
| <i>Parasubbotina inaequispira</i>        | <i>Guembeltrioides nuttalli</i>             | 45.4         | 46.4           | 1.0           | One cladogenetic event <sup>†</sup> (1)                                                                                                                 |
| <i>Clavigerinella caucasica</i>          | <i>Hantkenina singanoae</i> *               | 44.45        | 44.5           | 0.05          | One cladogenetic event <sup>†</sup> (8)                                                                                                                 |
| <i>Hantkenina singanoae</i>              | <i>Hantkenina mexicana</i> *                | 44.4         | 44.41          | 0.01          | One potential anagenetic event                                                                                                                          |
| <i>Hantkenina mexicana</i>               | <i>Hantkenina liebusi</i> *                 | 43.8         | 44.2           | 0.4           | One potential anagenetic event                                                                                                                          |
| <i>Igorina broedermanni</i>              | <i>Igorina anapetes</i>                     | 43.7         | 45.4           | 1.7           | One putative anagenetic <sup>§</sup> (6)                                                                                                                |
| <i>Subbotina roesnaesensis</i>           | <i>Globigerina officinalis</i> *            | 43.2         | 43.5           | 0.3           | One potential anagenetic event                                                                                                                          |
| <i>Globoturborotalita bassriverensis</i> | <i>Globoturborotalita ouachitaensis</i> *   | 42.4         | 43.1           | 0.7           | Two cladogenetic events ( <i>G. bassriverensis</i> – <i>G. martini</i> ; <i>G. bassriverensis</i> – <i>Turborotalita carcoselleensis</i> ) <sup>†</sup> |
| <i>G. bassriverensis</i>                 | <i>Globoturborotalita martini</i>           | 42.4         | 44             | 1.6           |                                                                                                                                                         |
| <i>G. bassriverensis</i>                 | <i>Turborotalita carcoselleensis</i>        | 42.4         | 44.4           | 2.0           | (1) and one potential anagenetic event                                                                                                                  |
| <i>Acarinina pseudosphaerica</i>         | <i>Acarinina echinata</i>                   | 42.3         | 43.2           | 0.9           | One cladogenetic event <sup>†</sup> (1)                                                                                                                 |

Table S1. Cont.

| Ancestor                              | Descendant                               | Ancestor LAD | Descendant FAD | Range overlap | Potential speciation mechanism                                                                                                                            |
|---------------------------------------|------------------------------------------|--------------|----------------|---------------|-----------------------------------------------------------------------------------------------------------------------------------------------------------|
| <i>Globigerinatheka curryi</i>        | <i>Globigerinatheka euganea</i>          | 41.6         | 42.8           | 1.2           | One potential anagenetic event                                                                                                                            |
| <i>Turborotalia frontosa</i>          | <i>Turborotalia pomeroli</i>             | 40.8         | 43.2           | 2.4           | One potential anagenetic event                                                                                                                            |
| <i>Globigerinatheka euganea</i>       | <i>Globigerinatheka luterbacheri*</i>    | 40.2         | 40.3           | 0.1           | One cladogenetic event and one potential anagenetic event <sup>†</sup>                                                                                    |
| <i>G. euganea</i>                     | <i>Orbulinoides beckmanni*</i>           | 40.2         | 40.5           | 0.3           |                                                                                                                                                           |
| <i>Hantkenina dumblei</i>             | <i>Hantkenina compressa</i>              | 39           | 41.2           | 2.2           | One potential anagenetic event                                                                                                                            |
| <i>Acarinina primitiva</i>            | <i>Dentoglobigerina galavisi*</i>        | 38.8         | 39             | 0.2           | One potential anagenetic event                                                                                                                            |
| <i>Turborotalita carcoselleensis</i>  | <i>Turborotalita praequinqueloba*</i>    | 35.9         | 36             | 0.1           | One potential anagenetic event                                                                                                                            |
| <i>Turborotalia cocoaensis</i>        | <i>Turborotalia cunialensis*</i>         | 33.8         | 34.1           | 0.3           | One potential anagenetic event                                                                                                                            |
| <i>Subbotina linaperta</i>            | <i>Subbotina utilizindex</i>             | 33.7         | 35.4           | 1.7           | One potential anagenetic event                                                                                                                            |
| <i>Dentoglobigerina sp.</i>           | <i>Dentoglobigerina prasaepis*</i>       | 32.9         | 33.3           | 0.4           | One cladogenetic event, one potential anagenetic event <sup>†</sup>                                                                                       |
| <i>Dentoglobigerina sp.</i>           | <i>Dentoglobigerina tapuriensis*</i>     | 32.9         | 33.7           | 0.8           |                                                                                                                                                           |
| <i>Subbotina sp. 1</i>                | <i>Subbotina sp. 2</i>                   | 32.6         | 33.8           | 1.2           | One cladogenetic event <sup>‡</sup> (1)                                                                                                                   |
| <i>Subbotina eocaena</i>              | <i>Subbotina sp. 1</i>                   | 32.2         | 34.1           | 1.9           | One cladogenetic event <sup>‡</sup> (1)                                                                                                                   |
| <i>Globoturborotalita martini</i>     | <i>Globoturborotalita labiacrassata*</i> | 30.3         | 30.4           | 0.1           | One cladogenetic event, one potential anagenetic event <sup>†</sup>                                                                                       |
| <i>G. martini</i>                     | <i>Globoturborotalita woodi*</i>         | 30.3         | 30.6           | 0.3           |                                                                                                                                                           |
| <i>Turborotalia ampliapertura</i>     | <i>Turborotalia euapertura</i>           | 30.3         | 32.65          | 2.35          | One potential anagenetic event                                                                                                                            |
| <i>Dentoglobigerina galavisi</i>      | <i>Dentoglobigerina larmeu*</i>          | 27.2         | 27.3           | 0.1           | One potential anagenetic event                                                                                                                            |
| <i>Dentoglobigerina sellii</i>        | <i>Dentoglobigerina binaiensis</i>       | 24.1         | 26             | 1.9           | One cladogenetic event <sup>‡</sup> (1)                                                                                                                   |
| <i>Protentelloides primitiva</i>      | <i>Protentelloides dalhousiei</i>        | 23.8         | 25.7           | 1.9           | One potential anagenetic event                                                                                                                            |
| <i>Paragloborotalia pseudokugleri</i> | <i>Paragloborotalia kugleri*</i>         | 23.5         | 23.8           | 0.3           | One potential anagenetic event                                                                                                                            |
| Neogene                               |                                          |              |                |               |                                                                                                                                                           |
| <i>Paragloborotalia kugleri</i>       | <i>Fohsella peripheroronda</i>           | 21.5         | 22             | 0.5           | One cladogenetic event <sup>‡</sup> (1)                                                                                                                   |
| <i>Catapsydrax parvulus</i>           | <i>Catapsydrax stainforthi*</i>          | 16.9         | 17.1           | 0.2           | One potential anagenetic event                                                                                                                            |
| <i>Praeorbulina circularis</i>        | <i>Orbulina suturalis*</i>               | 14.9         | 15.1           | 0.2           | One potential anagenetic event                                                                                                                            |
| <i>Hirsutella praescitula</i>         | <i>Hirsutella scitula*</i>               | 14.8         | 15             | 0.2           | One cladogenetic event, one potential anagenetic event <sup>†</sup>                                                                                       |
| <i>H. praescitula</i>                 | <i>Hirsutella challenger</i>             | 14.8         | 15.15          | 0.35          |                                                                                                                                                           |
| <i>Menardella archeomenardii</i>      | <i>Menardella praemenardii</i>           | 14.2         | 14.6           | 0.4           | One cladogenetic event <sup>‡</sup> (1)                                                                                                                   |
| <i>Fohsella peripheroronda</i>        | <i>Fohsella peripheroacuta</i>           | 13.8         | 14.3           | 0.5           | One potential anagenetic event                                                                                                                            |
| <i>F. peripheroacuta</i>              | <i>Fohsella praefohsi</i>                | 13.4         | 13.8           | 0.4           | One cladogenetic event <sup>‡</sup>                                                                                                                       |
| <i>F. peripheroacuta</i>              | <i>Fohsella linguaensis</i>              | 13.4         | 13.7           | 0.3           | ( <i>F. peripheroacuta</i> – <i>F. linguaensis</i> ) (1); one potential anagenetic event ( <i>F. peripheroacuta</i> – <i>F. praefohsi</i> )               |
| <i>Fohsella praefohsi</i>             | <i>Fohsella fohsi</i>                    | 13.1         | 13.4           | 0.3           | One cladogenetic event <sup>‡</sup> (9)                                                                                                                   |
| <i>Menardella praemenardii</i>        | <i>Menardella menardii*</i>              | 12.3         | 12.31          | 0.01          | One potential anagenetic event                                                                                                                            |
| <i>Hirsutella primitiva</i>           | <i>Hirsutella praemargaritae*</i>        | 5.7          | 5.9            | 0.2           | One potential anagenetic event                                                                                                                            |
| <i>Globorotalia merotumida</i>        | <i>Globorotalia plesiotumida</i>         | 5.8          | 6.4            | 0.6           | One potential anagenetic event                                                                                                                            |
| <i>Globoconella conoidea</i>          | <i>Globoconella conomiozea</i>           | 5.7          | 6              | 0.3           | One cladogenetic event <sup>‡</sup> (10)                                                                                                                  |
| <i>Globoconella conomiozea</i>        | <i>Globoconella terminalis*</i>          | 5.5          | 5.6            | 0.1           | One cladogenetic event <sup>‡</sup> (10)                                                                                                                  |
| <i>Globoconella terminalis</i>        | <i>Globoconella pliozea*</i>             | 5            | 5.05           | 0.05          | One cladogenetic event <sup>‡</sup>                                                                                                                       |
| <i>G. terminalis</i>                  | <i>Globoconella sphericomiozea</i>       | 5            | 5.4            | 0.4           | ( <i>G. terminalis</i> – <i>G. pliozea</i> ) (11) and one putative anagenetic event <sup>§</sup> ( <i>G. terminalis</i> – <i>G. sphericomiozea</i> ) (11) |

Table S1. Cont.

| Ancestor                            | Descendant                         | Ancestor LAD | Descendant FAD | Range overlap | Potential speciation mechanism                                      |
|-------------------------------------|------------------------------------|--------------|----------------|---------------|---------------------------------------------------------------------|
| <i>Globoconella sphericomiozea</i>  | <i>Globoconella puncticulata</i> * | 4.5          | 4.6            | 0.1           | One cladogenetic event <sup>‡</sup> (10)                            |
| <i>Pulleniatina praespectabilis</i> | <i>Pulleniatina spectabilis</i> *  | 4.4          | 4.6            | 0.2           | One potential anagenetic event                                      |
| <i>Pulleniatina spectabilis</i>     | <i>Pulleniatina finalis</i> *      | 4.2          | 4.25           | 0.05          | One potential anagenetic event                                      |
| <i>Hirsutella margaritae</i>        | <i>Hirsutella hirsuta</i> *        | 2.95         | 3              | 0.05          | One cladogenetic event, one potential anagenetic event <sup>†</sup> |
| <i>H. margaritae</i>                | <i>Hirsutella theyeri</i>          | 2.95         | 3.5            | 0.55          |                                                                     |
| <i>Globoconella puncticulata</i>    | <i>Globoconella inflata</i>        | 2.3          | 2.6            | 0.3           | One cladogenetic event <sup>‡</sup> (10)                            |
| <i>Menardella menardii</i>          | <i>Menardella fimbriata</i> *      | 0            | 0.2            | 0.2           | One cladogenetic event <sup>¶</sup>                                 |
| <i>Beella digitata</i>              | <i>Beella megastoma</i>            | 0            | 0.3            | 0.3           | One cladogenetic event <sup>¶</sup>                                 |

The listed events represent ancestor/descendant transitions where range overlap is within our estimate of total-error margins (2.4 Ma for the Paleogene; 0.6 Ma for the Neogene). Where the range of a morphospecies crosses the Paleogene/Neogene boundary, we apply our Paleogene estimate for total error to the FAD ( $\pm 1.2$  Ma) and our Neogene estimate for the error to the LAD ( $\pm 0.3$  Ma). Events where overlap is equal to or less than dating-error margins (0.8 Ma for the Paleogene; 0.2 Ma for the Neogene) are marked with an \*. For each listed event, we assume potential anagenesis, except where available evidence indicates putative anagenesis or cladogenesis. Evidence used includes:

<sup>†</sup>Two or more descendants originated from a single ancestor, indicating one potential anagenetic event and multiple cladogenetic events.

<sup>‡</sup>Frequency distributions of ancestor and descendant morphotypes are nonoverlapping in morphospace, or are overlapping in morphospace, but distinguishable, indicating cladogenesis (1, 11, 12). For events where ancestor/descendant overlap falls within dating error, we invoke ‡ only where co-occurring specimens can be demonstrated to constitute two or more populations with distinguishable frequency-distributions in morphospace (e.g. ref. 12). We use ancestor/descendant transitions designated speciation events by Aze et al. (1) to resolve typological error in light of their statement that empty morphospace between populations in multidimensional space is necessary for a speciation event to have occurred.

<sup>§</sup>Ancestor–descendant pairs cannot be differentiated in morphospace, indicating putative anagenesis.

<sup>¶</sup>Ancestor and descendant are both extant and therefore contemporaneous, indicating cladogenesis.

- Aze T, et al. (2011) A phylogeny of Cenozoic macroperforate planktonic foraminifera from fossil data. *Biol Rev Camb Philos Soc* 86(4):900–927.
- Corfield RM, Granlund AH (1988) Speciation and structural evolution in the Palaeocene *Morozovella* lineage (planktonic foraminifera). *Journal of Micropalaeontology* 7(1):59–72.
- Quillévéré F, Debat V, Auffray J-C (2002) Ontogenetic and evolutionary patterns of shape differentiation during the initial diversification of Paleocene acariniids (planktonic foraminifera). *Paleobiology* 28(4):435–448.
- Norris RD, Nishi H (2001) Evolutionary trends in coiling of tropical Paleogene planktic foraminifera. *Paleobiology* 27(2):327–347.
- Quillévéré F, Norris RD, Berggren WA, Aubry M-P (2000) 59.2 Ma and 56.5 Ma: Two significant moments in the evolution of acariniids (planktonic foraminifera). *GFF* 122(1):131–132.
- Soldan DM, Petrizzo MR, Silva IP, Cau A (2011) Phylogenetic relationships and evolutionary history of the Paleogene genus *Igorina* through parsimony analysis. *J Foraminiferal Res* 41(3):260–284.
- Kelly DC, Bralower TJ, Zachos JC (2001) On the demise of the early Paleogene *Morozovella velascoensis* lineage: Terminal progenesis in the planktonic foraminifera. *Palaio* 16(5):507–523.
- Coxall HK, Huber BT, Pearson PN (2003) Origin and morphology of the Eocene planktonic foraminifer *Hantkenina*. *J Foraminiferal Res* 33(3):237–261.
- Norris RD, Corfield RM, Cartledge J (1996) What is gradualism? Cryptic speciation in globorotaliid foraminifera. *Paleobiology* 22(3):386–405.
- Wei K-Y (1987) Multivariate morphometric differentiation of chronospecies in the late Neogene planktonic foraminiferal lineage *Globoconella*. *Mar Micropaleontol* 12:183–202.
- Wei K-Y, Kennett JP (1988) Phyletic gradualism and punctuated equilibrium in the Late Neogene planktonic foraminiferal clade *Globoconella*. *Paleobiology* 14(4):345–363.
- Hull PM, Norris RD (2009) Evidence for abrupt speciation in a classic case of gradual evolution. *Proc Natl Acad Sci USA* 106(50):21224–21229.
